# Supplementary material
Source: PubMed Central journal article supplement (PMC4856209)
Supplement: NIHMS66983-supplement-Supplementary_Tables.pdf [file NIHMS66983-supplement-Supplementary_Tables.pdf]

**Supplementary Table 1**

| Protein                   | Oligomerisation State | Max. Charge State | Spectral Resolution of Maximum Charge State (FWHM) | Theoretical Average Monomer Mass (Da) | Theoretical Average Complex Mass (Da) | Measured Average Mass (Da) | Standard Deviation ( $\pm$ Da) | <b>Error (Da)</b> | Previously Reported Measured Average Mass (Da) | Previously Reported Standard Deviation ( $\pm$ Da) | <b>Previously Reported Error (Da)</b> |
|---------------------------|-----------------------|-------------------|----------------------------------------------------|---------------------------------------|---------------------------------------|----------------------------|--------------------------------|-------------------|------------------------------------------------|----------------------------------------------------|---------------------------------------|
| chemokine receptor (CCR5) | Monomer               | 12                | 3008                                               | 43839.09                              | 43839.09                              | 43852.95                   | 0.12                           | <b>13.86</b>      | -                                              | -                                                  | -                                     |
| semiSWEET                 | Dimer                 | 8                 | 2503                                               | 13084.32                              | 26168.64                              | 26167.77                   | 0.21                           | <b>-0.87</b>      | -                                              | -                                                  | -                                     |
| OmpF                      | Trimer                | 23                | 3358                                               | 37084.10                              | 111252.29                             | 111252.27                  | 3.30                           | <b>-0.02</b>      | 111294                                         | 30                                                 | <b>42<sup>21</sup></b>                |
| AmtB                      | Trimer                | 17                | 2462                                               | 42263.38                              | 126790.15                             | 126788.12                  | 0.12                           | <b>-2.03</b>      | 126696                                         | 25                                                 | <b>-94<sup>12</sup></b>               |
| ELIC                      | Pentamer              | 30                | 1903                                               | 37133.20                              | 185665.99                             | 185679.90                  | 2.14                           | <b>13.92</b>      | 185829                                         | 44                                                 | <b>163<sup>14</sup></b>               |

**Supplementary Table 2**

|    | Charge State 25+ | 1 Ligand Bound           |                          | 2 Ligands Bound                   |                                   |                                   |
|----|------------------|--------------------------|--------------------------|-----------------------------------|-----------------------------------|-----------------------------------|
|    |                  | CsA                      | CDL                      | 2CsA                              | 1CDL 1CsA                         | 2CDL                              |
| P1 | 5672.81          | <b>5720.91</b> (5720.30) | <b>5722.48</b> (5722.11) | <b>5769.02</b> ( <b>5768.54</b> ) | <b>5770.58</b> ( <b>5770.30</b> ) | 5772.14                           |
| P2 | 5675.7           | 5723.80                  | 5725.37                  | <b>5771.91</b> ( <b>5771.75</b> ) | <b>5773.47</b> ( <b>5773.35</b> ) | <b>5775.03</b> ( <b>5775.03</b> ) |
| P3 | 5679.06          | 5727.16                  | 5728.73                  | 5775.27                           | 5776.83                           | 5778.39                           |

## Supplementary Table Legends

Supplementary Table 1 – Measured masses for membrane proteins in Figure 1a complete with experimental resolution of peak corresponding to the maximum charge state, mass error and comparison with previously published data.

Supplementary Table 2 - Assignment of species in Figure 1c and Supplementary Figure 6. Measured  $m/z$  of 25+ Pg-p P1-3 and expected  $m/z$  for addition of all combinations of ligands. Experimental  $m/z$  of assigned peaks are given in parentheses highlighted in bold.
